# Supplementary material for: Hexahydrocannabinol (HHC) and Δ9-tetrahydrocannabinol (Δ9-THC) driven activation of cannabinoid receptor 1 results in biased intracellular signaling
Source: PubMed Central journal article supplement (PMC11035541; doi:10.1038/s41598-024-58845-7), 2024-04-22
Supplement: 41598_2024_58845_MOESM1_ESM.pdf [file 41598_2024_58845_MOESM1_ESM.pdf]

## Hexahydrocannabinol (HHC) and $\Delta^9$ -tetrahydrocannabinol ( $\Delta^9$ -THC) driven activation of cannabinoid receptor 1 results in biased intracellular signaling

Oleh Durydivka, Petr Palivec, Matej Gazdarica, Ken Mackie, Jaroslav Blahos & Martin Kuchar

### Supplementary Information

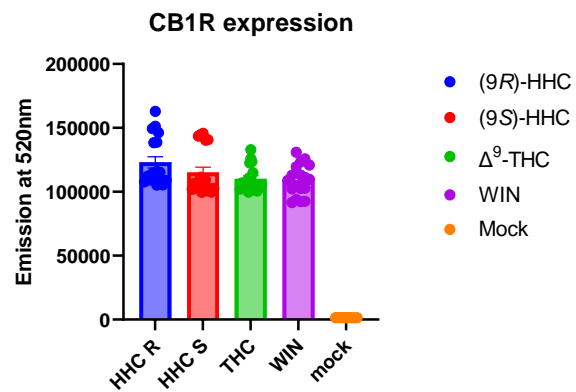

**Supplementary Figure 1.** Expression levels of SNAP-CB1R in transiently transfected HEK293 cells used in the receptor internalization assay (related to Fig. 4). Emission of SNAPLumi4-Tb-tagged CB1R-SNAP was measured at  $520 \pm 10$  nm upon excitation at  $340 \pm 26$  nm on Mithras LB 940 microplate reader.

**Supplementary Table 1.** Curve-fitting analysis of the G<sub>11</sub> activation data, presented in Figure 2. LogEC50 and EC50 represent ligand potency, and Top represents ligand efficacy.

| Compound                           | (9S)-HHC                    | (9R)-HHC                    | Δ <sup>9</sup> -THC         | WIN                         |
|------------------------------------|-----------------------------|-----------------------------|-----------------------------|-----------------------------|
| <b>Best-fit values</b>             |                             |                             |                             |                             |
| Bottom                             | -0.008036                   | -0.02847                    | -0.02623                    | -0.01680                    |
| Top                                | -0.06988                    | -0.1214                     | -0.1137                     | -0.1664                     |
| LogEC50                            | -6.597                      | -7.650                      | -7.876                      | -6.818                      |
| EC50                               | 2.532e-007                  | 2.238e-008                  | 1.330e-008                  | 1.522e-007                  |
| Span                               | -0.06184                    | -0.09290                    | -0.08749                    | -0.1496                     |
| <b>95% CI (profile likelihood)</b> |                             |                             |                             |                             |
| Bottom                             | -0.01980 to<br>0.003972     | -0.05146 to<br>-0.004468    | -0.04467 to<br>-0.007311    | -0.03316 to<br>-0.0002765   |
| Top                                | -0.08842 to<br>-0.05251     | -0.1484 to<br>-0.09620      | -0.1339 to<br>-0.09491      | -0.1921 to<br>-0.1434       |
| LogEC50                            | -7.327 to<br>-5.928         | -8.599 to<br>-6.712         | -8.648 to<br>-6.966         | -7.336 to<br>-6.229         |
| EC50                               | 4.705e-008 to<br>1.179e-006 | 2.515e-009 to<br>1.943e-007 | 2.248e-009 to<br>1.081e-007 | 4.612e-008 to<br>5.905e-007 |
| <b>Goodness of Fit</b>             |                             |                             |                             |                             |
| Degrees of Freedom                 | 24                          | 24                          | 24                          | 24                          |
| R squared                          | 0.6062                      | 0.5710                      | 0.6702                      | 0.8489                      |
| Sum of Squares                     | 0.01192                     | 0.03509                     | 0.02047                     | 0.01982                     |
| Sy.x                               | 0.02229                     | 0.03824                     | 0.02921                     | 0.02874                     |

**Supplementary Table 2.** Curve-fitting analysis of the G<sub>oA</sub> activation data, presented in Figure 2. LogEC50 and EC50 represent ligand potency, and Top represents ligand efficacy.

| Compound                           | (9S)-HHC                    | (9R)-HHC                    | Δ <sup>9</sup> -THC         | WIN                         |
|------------------------------------|-----------------------------|-----------------------------|-----------------------------|-----------------------------|
| <b>Best-fit values</b>             |                             |                             |                             |                             |
| Bottom                             | -0.0007050                  | -0.009940                   | -0.01025                    | -0.01486                    |
| Top                                | -0.1031                     | -0.1330                     | -0.1255                     | -0.1498                     |
| LogEC50                            | -6.633                      | -7.623                      | -8.069                      | -7.223                      |
| EC50                               | 2.329e-007                  | 2.381e-008                  | 8.529e-009                  | 5.986e-008                  |
| Span                               | -0.1024                     | -0.1230                     | -0.1153                     | -0.1349                     |
| <b>95% CI (profile likelihood)</b> |                             |                             |                             |                             |
| Bottom                             | -0.008361 to<br>0.007019    | -0.01821 to<br>-0.001553    | -0.01768 to<br>-0.002737    | -0.02691 to<br>-0.002565    |
| Top                                | -0.1148 to<br>-0.09178      | -0.1423 to<br>-0.1238       | -0.1329 to<br>-0.1182       | -0.1654 to<br>-0.1345       |
| LogEC50                            | -6.911 to<br>-6.357         | -7.884 to<br>-7.357         | -8.298 to<br>-7.846         | -7.611 to<br>-6.872         |
| EC50                               | 1.228e-007 to<br>4.393e-007 | 1.307e-008 to<br>4.397e-008 | 5.036e-009 to<br>1.425e-008 | 2.447e-008 to<br>1.341e-007 |
| <b>Goodness of Fit</b>             |                             |                             |                             |                             |
| Degrees of Freedom                 | 24                          | 24                          | 24                          | 24                          |
| R squared                          | 0.9117                      | 0.9496                      | 0.9581                      | 0.9015                      |
| Sum of Squares                     | 0.004908                    | 0.004340                    | 0.003158                    | 0.01042                     |
| Sy.x                               | 0.01430                     | 0.01345                     | 0.01147                     | 0.02084                     |

**Supplementary Table 3.** Curve-fitting analysis of the GRK3-CB1R interaction data, presented in Figure 3. LogEC50 and EC50 represent ligand potency, and Top represents ligand efficacy.

| Compound                           | (9S)-HHC                  | (9R)-HHC                    | $\Delta^9$ -THC             | WIN                         |
|------------------------------------|---------------------------|-----------------------------|-----------------------------|-----------------------------|
| <b>Best-fit values</b>             |                           |                             |                             |                             |
| Bottom                             | -0.002394                 | 0.001923                    | -0.0004729                  | 0.005882                    |
| Top                                | 0.02599                   | 0.03543                     | 0.01409                     | 0.06538                     |
| LogEC50                            | -4.983                    | -6.172                      | -6.250                      | -6.712                      |
| EC50                               | 1.041e-005                | 6.731e-007                  | 5.624e-007                  | 1.940e-007                  |
| Span                               | 0.02838                   | 0.03351                     | 0.01456                     | 0.05950                     |
| <b>95% CI (profile likelihood)</b> |                           |                             |                             |                             |
| Bottom                             | -0.006911 to<br>0.001333  | -0.001247 to<br>0.005034    | -0.003035 to<br>0.001880    | 1.282e-005 to<br>0.01166    |
| Top                                | 0.01168 to<br>0.5234      | 0.02976 to<br>0.04153       | 0.009846 to<br>0.01960      | 0.05691 to<br>0.07450       |
| LogEC50                            | -7.057 to<br>-2.711       | -6.690 to<br>-5.700         | -7.324 to<br>-5.146         | -7.163 to<br>-6.245         |
| EC50                               | 8.780e-008 to<br>0.001943 | 2.044e-007 to<br>1.997e-006 | 4.737e-008 to<br>7.138e-006 | 6.872e-008 to<br>5.690e-007 |
| <b>Goodness of Fit</b>             |                           |                             |                             |                             |
| Degrees of Freedom                 | 24                        | 24                          | 24                          | 24                          |
| R squared                          | 0.5735                    | 0.8513                      | 0.6729                      | 0.8692                      |
| Sum of Squares                     | 0.001474                  | 0.0008500                   | 0.0004568                   | 0.002604                    |
| Sy.x                               | 0.007837                  | 0.005951                    | 0.004363                    | 0.01042                     |

**Supplementary Table 4.** Curve-fitting analysis of the  $\beta$ -arrestin2-CB1R interaction data, presented in Figure 3. LogEC50 and EC50 represent ligand potency, and Top represents ligand efficacy.

| Compound                           | (9S)-HHC                   | (9R)-HHC                    | $\Delta^9$ -THC            | WIN                         |
|------------------------------------|----------------------------|-----------------------------|----------------------------|-----------------------------|
| <b>Best-fit values</b>             |                            |                             |                            |                             |
| Bottom                             | -0.002803                  | -0.005400                   | 0.0005880                  | 0.0008429                   |
| Top                                | 0.01618                    | 0.01657                     | 0.004772                   | 0.03307                     |
| LogEC50                            | -4.165                     | -5.284                      | -6.765                     | -6.344                      |
| EC50                               | 6.846e-005                 | 5.200e-006                  | 1.717e-007                 | 4.526e-007                  |
| Span                               | 0.01899                    | 0.02197                     | 0.004184                   | 0.03223                     |
| <b>95% CI (profile likelihood)</b> |                            |                             |                            |                             |
| Bottom                             | -0.004790 to<br>-0.0008480 | -0.007917 to<br>-0.002964   | -0.001292 to<br>0.002402   | -0.001783 to<br>0.003441    |
| Top                                | 0.004019 to ND             | 0.009883 to<br>0.02542      | 0.002288 to<br>0.009830    | 0.02875 to<br>0.03762       |
| LogEC50                            | -5.513 to ND               | -6.082 to<br>-4.612         | -10.35 to<br>-3.970        | -6.687 to<br>-6.013         |
| EC50                               | 3.070e-006 to<br>ND        | 8.281e-007 to<br>2.444e-005 | 4.417e-011 to<br>0.0001070 | 2.056e-007 to<br>9.701e-007 |
| <b>Goodness of Fit</b>             |                            |                             |                            |                             |
| Degrees of Freedom                 | 24                         | 24                          | 24                         | 24                          |
| R squared                          | 0.4298                     | 0.7050                      | 0.2390                     | 0.8877                      |
| Sum of Squares                     | 0.0004427                  | 0.0006098                   | 0.0002752                  | 0.0005947                   |
| Sy.x                               | 0.004295                   | 0.005041                    | 0.003386                   | 0.004978                    |

ND, non-determinable

**Supplementary Table 5.** Statistical analysis of the data presented in Fig. 4 by ANOVA

| <b>Anova results</b>                |                             |                |                        |                         |                                     |
|-------------------------------------|-----------------------------|----------------|------------------------|-------------------------|-------------------------------------|
| <b>Two-way RM ANOVA</b>             | Matching:<br>Stacked        |                |                        |                         |                                     |
| <b>Assume sphericity?</b>           | No                          |                |                        |                         |                                     |
| <b>Alpha</b>                        | 0.05                        |                |                        |                         |                                     |
| <b>Source of Variation</b>          | <b>% of total variation</b> | <b>P value</b> | <b>P value summary</b> | <b>Significant?</b>     | <b>Geisser-Greenhouse's epsilon</b> |
| <b>Time x agonist</b>               | 5.127                       | <0,0001        | ****                   | Yes                     |                                     |
| <b>Time</b>                         | 71.2                        | <0,0001        | ****                   | Yes                     | 0.2536                              |
| <b>agonist</b>                      | 14.35                       | <0,0001        | ****                   | Yes                     |                                     |
| <b>Subject</b>                      | 8.563                       | <0,0001        | ****                   | Yes                     |                                     |
| <b>ANOVA table</b>                  | <b>SS</b>                   | <b>DF</b>      | <b>MS</b>              | <b>F (DFn, DFd)</b>     | <b>P value</b>                      |
| <b>Time x agonist</b>               | 2162881                     | 18             | 120160                 | F (18, 192) = 72,51     | P<0,0001                            |
| <b>Time</b>                         | 30036521                    | 6              | 5006087                | F (1,521, 48,68) = 3021 | P<0,0001                            |
| <b>agonist</b>                      | 6054030                     | 3              | 2018010                | F (3, 32) = 17,88       | P<0,0001                            |
| <b>Subject</b>                      | 3612152                     | 32             | 112880                 | F (32, 192) = 68,12     | P<0,0001                            |
| <b>Residual</b>                     | 318174                      | 192            | 1657                   |                         |                                     |
| <b>Data summary</b>                 |                             |                |                        |                         |                                     |
| <b>Number of columns (agonist)</b>  | 4                           |                |                        |                         |                                     |
| <b>Number of rows (Time)</b>        | 7                           |                |                        |                         |                                     |
| <b>Number of subjects (Subject)</b> | 36                          |                |                        |                         |                                     |

**Number of missing values** 0

**Multiple comparisons**

**Number of families** 7

**Number of comparisons per family** 6

**Alpha** 0.05

| <b>Tukey's multiple comparisons test</b> | <b>Mean Diff,</b> | <b>95,00% CI of diff,</b> | <b>Below threshold?</b> | <b>Summary</b> | <b>Adjusted P Value</b> |
|------------------------------------------|-------------------|---------------------------|-------------------------|----------------|-------------------------|
|------------------------------------------|-------------------|---------------------------|-------------------------|----------------|-------------------------|

**Row 1**

|                        |       |                 |    |    |        |
|------------------------|-------|-----------------|----|----|--------|
| <b>HHC R vs. HHC S</b> | 23.95 | -118,4 to 166,3 | No | ns | 0.9619 |
|------------------------|-------|-----------------|----|----|--------|

|                      |       |                 |    |    |        |
|----------------------|-------|-----------------|----|----|--------|
| <b>HHC R vs. THC</b> | 66.53 | -49,63 to 182,7 | No | ns | 0.3789 |
|----------------------|-------|-----------------|----|----|--------|

|                      |       |                 |    |    |        |
|----------------------|-------|-----------------|----|----|--------|
| <b>HHC R vs. WIN</b> | 98.79 | -12,22 to 209,8 | No | ns | 0.0878 |
|----------------------|-------|-----------------|----|----|--------|

|                      |       |                 |    |    |       |
|----------------------|-------|-----------------|----|----|-------|
| <b>HHC S vs. THC</b> | 42.58 | -85,73 to 170,9 | No | ns | 0.768 |
|----------------------|-------|-----------------|----|----|-------|

|                      |       |                 |    |    |        |
|----------------------|-------|-----------------|----|----|--------|
| <b>HHC S vs. WIN</b> | 74.84 | -49,31 to 199,0 | No | ns | 0.3226 |
|----------------------|-------|-----------------|----|----|--------|

|                    |       |                 |    |    |        |
|--------------------|-------|-----------------|----|----|--------|
| <b>THC vs. WIN</b> | 32.26 | -52,93 to 117,5 | No | ns | 0.7013 |
|--------------------|-------|-----------------|----|----|--------|

**Row 2**

|                        |       |                 |    |    |       |
|------------------------|-------|-----------------|----|----|-------|
| <b>HHC R vs. HHC S</b> | 94.79 | -58,51 to 248,1 | No | ns | 0.321 |
|------------------------|-------|-----------------|----|----|-------|

|                      |       |                |     |   |        |
|----------------------|-------|----------------|-----|---|--------|
| <b>HHC R vs. THC</b> | 141.2 | 1,899 to 280,4 | Yes | * | 0.0466 |
|----------------------|-------|----------------|-----|---|--------|

|                            |        |                     |     |      |         |
|----------------------------|--------|---------------------|-----|------|---------|
| <b>HHC R vs. WIN</b>       | -65.93 | -203,0 to<br>71,17  | No  | ns   | 0.505   |
| <b>HHC S vs. THC</b>       | 46.38  | -72,86 to<br>165,6  | No  | ns   | 0.6782  |
| <b>HHC S vs. WIN</b>       | -160.7 | -277,0 to<br>-44,47 | Yes | **   | 0.0064  |
| <b>THC vs. WIN</b>         | -207.1 | -295,8 to<br>-118,4 | Yes | **** | <0,0001 |
| <b>Row 3</b>               |        |                     |     |      |         |
| <b>HHC R vs.<br/>HHC S</b> | 131.7  | -53,52 to<br>317,0  | No  | ns   | 0.2159  |
| <b>HHC R vs. THC</b>       | 203.9  | 35,64 to<br>372,1   | Yes | *    | 0.0161  |
| <b>HHC R vs. WIN</b>       | -215.3 | -387,5 to<br>-43,04 | Yes | *    | 0.0128  |
| <b>HHC S vs. THC</b>       | 72.16  | -77,46 to<br>221,8  | No  | ns   | 0.5212  |
| <b>HHC S vs. WIN</b>       | -347   | -501,6 to<br>-192,4 | Yes | **** | <0,0001 |
| <b>THC vs. WIN</b>         | -419.2 | -547,9 to<br>-290,4 | Yes | **** | <0,0001 |
| <b>Row 4</b>               |        |                     |     |      |         |
| <b>HHC R vs.<br/>HHC S</b> | 135.5  | -64,82 to<br>335,8  | No  | ns   | 0.2528  |
| <b>HHC R vs. THC</b>       | 241.6  | 63,21 to<br>420,1   | Yes | **   | 0.0072  |
| <b>HHC R vs. WIN</b>       | -269.6 | -467,9 to<br>-71,25 | Yes | **   | 0.0065  |
| <b>HHC S vs. THC</b>       | 106.1  | -64,86 to<br>277,1  | No  | ns   | 0.3141  |
| <b>HHC S vs. WIN</b>       | -405.1 | -597,4 to<br>-212,8 | Yes | **** | <0,0001 |
| <b>THC vs. WIN</b>         | -511.2 | -679,5 to<br>-342,9 | Yes | **** | <0,0001 |

**Row 5**

|                        |        |                  |     |      |         |
|------------------------|--------|------------------|-----|------|---------|
| <b>HHC R vs. HHC S</b> | 113.4  | -93,51 to 320,4  | No  | ns   | 0.423   |
| <b>HHC R vs. THC</b>   | 242.8  | 63,43 to 422,1   | Yes | **   | 0.0071  |
| <b>HHC R vs. WIN</b>   | -316.4 | -516,1 to -116,7 | Yes | **   | 0.0017  |
| <b>HHC S vs. THC</b>   | 129.3  | -52,46 to 311,1  | No  | ns   | 0.2116  |
| <b>HHC S vs. WIN</b>   | -429.8 | -631,6 to -228,1 | Yes | **** | <0,0001 |
| <b>THC vs. WIN</b>     | -559.2 | -731,6 to -386,7 | Yes | **** | <0,0001 |

**Row 6**

|                        |        |                  |     |      |         |
|------------------------|--------|------------------|-----|------|---------|
| <b>HHC R vs. HHC S</b> | 44.44  | -203,6 to 292,5  | No  | ns   | 0.9548  |
| <b>HHC R vs. THC</b>   | 233.6  | 26,44 to 440,7   | Yes | *    | 0.0252  |
| <b>HHC R vs. WIN</b>   | -376.5 | -612,2 to -140,8 | Yes | **   | 0.0016  |
| <b>HHC S vs. THC</b>   | 189.1  | -25,76 to 404,0  | No  | ns   | 0.0928  |
| <b>HHC S vs. WIN</b>   | -420.9 | -662,7 to -179,1 | Yes | **** | 0.0007  |
| <b>THC vs. WIN</b>     | -610.1 | -808,3 to -411,8 | Yes | **** | <0,0001 |

**Row 7**

|                        |        |                  |     |      |         |
|------------------------|--------|------------------|-----|------|---------|
| <b>HHC R vs. HHC S</b> | -78.04 | -319,9 to 163,9  | No  | ns   | 0.7901  |
| <b>HHC R vs. THC</b>   | 232.9  | 42,50 to 423,3   | Yes | *    | 0.0144  |
| <b>HHC R vs. WIN</b>   | -481.6 | -702,0 to -261,3 | Yes | **** | <0,0001 |
| <b>HHC S vs. THC</b>   | 311    | 83,12 to 538,8   | Yes | **   | 0.007   |

|                      |        |                     |     |      |         |
|----------------------|--------|---------------------|-----|------|---------|
| <b>HHC S vs. WIN</b> | -403.6 | -653,8 to<br>-153,3 | Yes | **   | 0.0015  |
| <b>THC vs. WIN</b>   | -714.5 | -917,7 to<br>-511,4 | Yes | **** | <0,0001 |

| Test details               | Mean 1 | Mean 2 | Mean Diff, | SE of diff, | N1 | N2 | q         | DF        |
|----------------------------|--------|--------|------------|-------------|----|----|-----------|-----------|
| <b>Row 1</b>               |        |        |            |             |    |    |           |           |
| <b>HHC R vs.<br/>HHC S</b> | 2021   | 1997   | 23.95      | 49.67       | 9  | 9  | 0.6<br>82 | 15.<br>74 |
| <b>HHC R vs. THC</b>       | 2021   | 1954   | 66.53      | 40.09       | 9  | 9  | 2.3<br>47 | 14.<br>37 |
| <b>HHC R vs. WIN</b>       | 2021   | 1922   | 98.79      | 37.68       | 9  | 9  | 3.7<br>08 | 12.<br>66 |
| <b>HHC S vs. THC</b>       | 1997   | 1954   | 42.58      | 43.87       | 9  | 9  | 1.3<br>73 | 13.<br>34 |
| <b>HHC S vs. WIN</b>       | 1997   | 1922   | 74.84      | 41.68       | 9  | 9  | 2.5<br>4  | 11.<br>74 |
| <b>THC vs. WIN</b>         | 1954   | 1922   | 32.26      | 29.63       | 9  | 9  | 1.5<br>4  | 15.<br>3  |

|                            |      |      |        |       |   |   |           |           |
|----------------------------|------|------|--------|-------|---|---|-----------|-----------|
| <b>Row 2</b>               |      |      |        |       |   |   |           |           |
| <b>HHC R vs.<br/>HHC S</b> | 2183 | 2088 | 94.79  | 53.36 | 9 | 9 | 2.5<br>12 | 15.<br>43 |
| <b>HHC R vs. THC</b>       | 2183 | 2042 | 141.2  | 47.24 | 9 | 9 | 4.2<br>26 | 12.<br>59 |
| <b>HHC R vs. WIN</b>       | 2183 | 2249 | -65.93 | 46.04 | 9 | 9 | 2.0<br>25 | 11.<br>76 |
| <b>HHC S vs. THC</b>       | 2088 | 2042 | 46.38  | 41.07 | 9 | 9 | 1.5<br>97 | 14.<br>11 |
| <b>HHC S vs. WIN</b>       | 2088 | 2249 | -160.7 | 39.68 | 9 | 9 | 5.7<br>28 | 13.<br>18 |
| <b>THC vs. WIN</b>         | 2042 | 2249 | -207.1 | 30.96 | 9 | 9 | 9.4<br>61 | 15.<br>79 |

|              |  |  |  |  |  |  |  |  |
|--------------|--|--|--|--|--|--|--|--|
| <b>Row 3</b> |  |  |  |  |  |  |  |  |
|--------------|--|--|--|--|--|--|--|--|



|                        |      |      |        |       |   |   |     |       |    |
|------------------------|------|------|--------|-------|---|---|-----|-------|----|
| <b>HHC R vs. HHC S</b> | 2410 | 2279 | 131.7  | 64.58 | 9 | 9 | 2.8 | 15.84 | 64 |
| <b>HHC R vs. THC</b>   | 2410 | 2207 | 203.9  | 57.48 | 9 | 9 | 5.0 | 13.16 | 27 |
| <b>HHC R vs. WIN</b>   | 2410 | 2626 | -215.3 | 59.33 | 9 | 9 | 5.1 | 14.32 | 12 |
| <b>HHC S vs. THC</b>   | 2279 | 2207 | 72.16  | 51.69 | 9 | 9 | 1.9 | 14.74 | 48 |
| <b>HHC S vs. WIN</b>   | 2279 | 2626 | -347   | 53.74 | 9 | 9 | 9.1 | 15.32 | 23 |
| <b>THC vs. WIN</b>     | 2207 | 2626 | -419.2 | 44.95 | 9 | 9 | 13. | 15.19 | 82 |

**Row 4**

|                        |      |      |        |       |   |   |     |       |    |
|------------------------|------|------|--------|-------|---|---|-----|-------|----|
| <b>HHC R vs. HHC S</b> | 2573 | 2438 | 135.5  | 69.99 | 9 | 9 | 2.7 | 15.38 | 95 |
| <b>HHC R vs. THC</b>   | 2573 | 2332 | 241.6  | 61.41 | 9 | 9 | 5.5 | 14.65 | 04 |
| <b>HHC R vs. WIN</b>   | 2573 | 2843 | -269.6 | 69.28 | 9 | 9 | 5.5 | 15.03 | 9  |
| <b>HHC S vs. THC</b>   | 2438 | 2332 | 106.1  | 59.08 | 9 | 9 | 2.5 | 14.4  | 49 |
| <b>HHC S vs. WIN</b>   | 2438 | 2843 | -405.1 | 67.22 | 9 | 9 | 8.5 | 15.23 | 99 |
| <b>THC vs. WIN</b>     | 2332 | 2843 | -511.2 | 58.23 | 9 | 9 | 12. | 14.42 | 65 |

**Row 5**

|                        |      |      |        |       |   |   |     |       |    |
|------------------------|------|------|--------|-------|---|---|-----|-------|----|
| <b>HHC R vs. HHC S</b> | 2667 | 2553 | 113.4  | 72.33 | 9 | 9 | 2.2 | 15.18 | 99 |
| <b>HHC R vs. THC</b>   | 2667 | 2424 | 242.8  | 61.88 | 9 | 9 | 5.5 | 14.48 | 33 |
| <b>HHC R vs. WIN</b>   | 2667 | 2983 | -316.4 | 69.79 | 9 | 9 | 6.4 | 15.12 | 95 |
| <b>HHC S vs. THC</b>   | 2553 | 2424 | 129.3  | 62.65 | 9 | 9 | 2.9 | 14.19 | 19 |

|                      |      |      |        |       |   |   |     |     |
|----------------------|------|------|--------|-------|---|---|-----|-----|
| <b>HHC S vs. WIN</b> | 2553 | 2983 | -429.8 | 70.47 | 9 | 9 | 8.6 | 15. |
|                      |      |      |        |       |   |   | 26  | 92  |
| <b>THC vs. WIN</b>   | 2424 | 2983 | -559.2 | 59.7  | 9 | 9 | 13. | 14. |
|                      |      |      |        |       |   |   | 24  | 74  |
| <b>Row 6</b>         |      |      |        |       |   |   |     |     |
| <b>HHC R vs.</b>     | 2785 | 2740 | 44.44  | 86.67 | 9 | 9 | 0.7 | 15. |
| <b>HHC S</b>         |      |      |        |       |   |   | 252 | 97  |
| <b>HHC R vs. THC</b> | 2785 | 2551 | 233.6  | 70.98 | 9 | 9 | 4.6 | 13. |
|                      |      |      |        |       |   |   | 54  | 58  |
| <b>HHC R vs. WIN</b> | 2785 | 3161 | -376.5 | 82.35 | 9 | 9 | 6.4 | 15. |
|                      |      |      |        |       |   |   | 65  | 95  |
| <b>HHC S vs. THC</b> | 2740 | 2551 | 189.1  | 73.37 | 9 | 9 | 3.6 | 13. |
|                      |      |      |        |       |   |   | 45  | 21  |
| <b>HHC S vs. WIN</b> | 2740 | 3161 | -420.9 | 84.42 | 9 | 9 | 7.0 | 15. |
|                      |      |      |        |       |   |   | 51  | 83  |
| <b>THC vs. WIN</b>   | 2551 | 3161 | -610.1 | 68.22 | 9 | 9 | 12. | 14. |
|                      |      |      |        |       |   |   | 65  | 03  |
| <b>Row 7</b>         |      |      |        |       |   |   |     |     |
| <b>HHC R vs.</b>     | 2958 | 3036 | -78.04 | 84.02 | 9 | 9 | 1.3 | 15. |
| <b>HHC S</b>         |      |      |        |       |   |   | 14  | 13  |
| <b>HHC R vs. THC</b> | 2958 | 2725 | 232.9  | 66.19 | 9 | 9 | 4.9 | 15. |
|                      |      |      |        |       |   |   | 77  | 23  |
| <b>HHC R vs. WIN</b> | 2958 | 3440 | -481.6 | 76.94 | 9 | 9 | 8.8 | 15. |
|                      |      |      |        |       |   |   | 52  | 86  |
| <b>HHC S vs. THC</b> | 3036 | 2725 | 311    | 77.94 | 9 | 9 | 5.6 | 13. |
|                      |      |      |        |       |   |   | 42  | 4   |
| <b>HHC S vs. WIN</b> | 3036 | 3440 | -403.6 | 87.26 | 9 | 9 | 6.5 | 15. |
|                      |      |      |        |       |   |   | 41  | 65  |
| <b>THC vs. WIN</b>   | 2725 | 3440 | -714.5 | 70.26 | 9 | 9 | 14. | 14. |
|                      |      |      |        |       |   |   | 38  | 58  |

**Supplementary Table 6.** Statistical analysis of the data presented in Fig. 5 by ANOVA

**Anova results**

|                           |                      |
|---------------------------|----------------------|
| <b>Two-way RM ANOVA</b>   | Matching:<br>Stacked |
| <b>Assume sphericity?</b> | No                   |
| <b>Alpha</b>              | 0.05                 |

| <b>Source of Variation</b> | % of total variation | P value | P value summary | Significant ? | Geisser-Greenhouse's epsilon |
|----------------------------|----------------------|---------|-----------------|---------------|------------------------------|
| <b>Time x agonist</b>      | 4.528                | 0.0002  | ***             | Yes           |                              |
| <b>Time</b>                | 6.802                | <0,0001 | ****            | Yes           | 0.7975                       |
| <b>agonist</b>             | 5.781                | 0.4345  | ns              | No            |                              |
| <b>Subject</b>             | 65.85                | <0,0001 | ****            | Yes           |                              |

| <b>ANOVA table</b>    | SS      | DF  | MS    | F (DFn, DFd)             | P value  |
|-----------------------|---------|-----|-------|--------------------------|----------|
| <b>Time x agonist</b> | 156142  | 18  | 8675  | F (18, 192) = 2,835      | P=0,0002 |
| <b>Time</b>           | 234564  | 6   | 39094 | F (4,785, 153,1) = 12,78 | P<0,0001 |
| <b>agonist</b>        | 199339  | 3   | 66446 | F (3, 32) = 0,9364       | P=0,4345 |
| <b>Subject</b>        | 2270733 | 32  | 70960 | F (32, 192) = 23,19      | P<0,0001 |
| <b>Residual</b>       | 587435  | 192 | 3060  |                          |          |

**Data summary**

|                                     |    |
|-------------------------------------|----|
| <b>Number of columns (agonist)</b>  | 4  |
| <b>Number of rows (Time)</b>        | 7  |
| <b>Number of subjects (Subject)</b> | 36 |

**Number of missing values** 0

**Multiple comparisons**

**Number of families** 7

**Number of comparisons per family** 6

**Alpha** 0.05

| <b>Tukey's multiple comparisons test</b> | <b>Mean Diff,</b> | <b>95,00% CI of diff,</b> | <b>Below threshold ?</b> | <b>Summary</b> | <b>Adjusted P Value</b> |
|------------------------------------------|-------------------|---------------------------|--------------------------|----------------|-------------------------|
|------------------------------------------|-------------------|---------------------------|--------------------------|----------------|-------------------------|

**Row 1**

|                        |       |                 |    |    |        |
|------------------------|-------|-----------------|----|----|--------|
| <b>R-HHC vs. S-HHC</b> | 38.63 | -126,7 to 203,9 | No | ns | 0.9074 |
|------------------------|-------|-----------------|----|----|--------|

|                      |       |                 |    |    |        |
|----------------------|-------|-----------------|----|----|--------|
| <b>R-HHC vs. THC</b> | 8.796 | -144,0 to 161,6 | No | ns | 0.9983 |
|----------------------|-------|-----------------|----|----|--------|

|                      |      |                 |    |    |        |
|----------------------|------|-----------------|----|----|--------|
| <b>R-HHC vs. WIN</b> | 11.8 | -132,9 to 156,5 | No | ns | 0.9951 |
|----------------------|------|-----------------|----|----|--------|

|                      |        |                 |    |    |        |
|----------------------|--------|-----------------|----|----|--------|
| <b>S-HHC vs. THC</b> | -29.83 | -181,2 to 121,6 | No | ns | 0.9407 |
|----------------------|--------|-----------------|----|----|--------|

|                      |        |                 |    |    |        |
|----------------------|--------|-----------------|----|----|--------|
| <b>S-HHC vs. WIN</b> | -26.82 | -170,0 to 116,4 | No | ns | 0.9469 |
|----------------------|--------|-----------------|----|----|--------|

|                    |       |                 |    |    |        |
|--------------------|-------|-----------------|----|----|--------|
| <b>THC vs. WIN</b> | 3.008 | -123,1 to 129,1 | No | ns | 0.9999 |
|--------------------|-------|-----------------|----|----|--------|

**Row 2**

|                        |        |                 |    |    |        |
|------------------------|--------|-----------------|----|----|--------|
| <b>R-HHC vs. S-HHC</b> | -11.08 | -122,7 to 100,6 | No | ns | 0.9916 |
|------------------------|--------|-----------------|----|----|--------|

|                      |        |                 |    |    |        |
|----------------------|--------|-----------------|----|----|--------|
| <b>R-HHC vs. THC</b> | -20.63 | -157,9 to 116,7 | No | ns | 0.9707 |
|----------------------|--------|-----------------|----|----|--------|

|                        |        |                  |     |    |        |
|------------------------|--------|------------------|-----|----|--------|
| <b>R-HHC vs. WIN</b>   | -52.16 | -209,8 to 105,4  | No  | ns | 0.7636 |
| <b>S-HHC vs. THC</b>   | -9.551 | -152,4 to 133,3  | No  | ns | 0.9973 |
| <b>S-HHC vs. WIN</b>   | -41.09 | -203,0 to 120,8  | No  | ns | 0.8789 |
| <b>THC vs. WIN</b>     | -31.53 | -207,8 to 144,7  | No  | ns | 0.9547 |
| <b>Row 3</b>           |        |                  |     |    |        |
| <b>R-HHC vs. S-HHC</b> | 17.42  | -111,2 to 146,0  | No  | ns | 0.9795 |
| <b>R-HHC vs. THC</b>   | -11.64 | -164,8 to 141,5  | No  | ns | 0.9961 |
| <b>R-HHC vs. WIN</b>   | -177.2 | -360,6 to 6,082  | No  | ns | 0.0595 |
| <b>S-HHC vs. THC</b>   | -29.06 | -177,4 to 119,2  | No  | ns | 0.9404 |
| <b>S-HHC vs. WIN</b>   | -194.7 | -374,6 to -14,68 | Yes | *  | 0.0326 |
| <b>THC vs. WIN</b>     | -165.6 | -359,9 to 28,65  | No  | ns | 0.1086 |
| <b>Row 4</b>           |        |                  |     |    |        |
| <b>R-HHC vs. S-HHC</b> | 35.11  | -86,56 to 156,8  | No  | ns | 0.8398 |
| <b>R-HHC vs. THC</b>   | 8.921  | -111,2 to 129,1  | No  | ns | 0.9964 |
| <b>R-HHC vs. WIN</b>   | -79.09 | -247,3 to 89,17  | No  | ns | 0.5401 |
| <b>S-HHC vs. THC</b>   | -26.19 | -132,6 to 80,23  | No  | ns | 0.894  |
| <b>S-HHC vs. WIN</b>   | -114.2 | -275,8 to 47,38  | No  | ns | 0.2106 |
| <b>THC vs. WIN</b>     | -88.01 | -248,7 to 72,71  | No  | ns | 0.4036 |

**Row 5**

|                        |        |                 |    |    |        |
|------------------------|--------|-----------------|----|----|--------|
| <b>R-HHC vs. S-HHC</b> | -8.598 | -166,3 to 149,1 | No | ns | 0.9985 |
| <b>R-HHC vs. THC</b>   | 4.088  | -133,0 to 141,1 | No | ns | 0.9998 |
| <b>R-HHC vs. WIN</b>   | -64.75 | -226,0 to 96,55 | No | ns | 0.6577 |
| <b>S-HHC vs. THC</b>   | 12.69  | -151,2 to 176,6 | No | ns | 0.9959 |
| <b>S-HHC vs. WIN</b>   | -56.15 | -238,4 to 126,1 | No | ns | 0.8142 |
| <b>THC vs. WIN</b>     | -68.84 | -236,1 to 98,40 | No | ns | 0.6449 |

**Row 6**

|                        |         |                 |    |    |         |
|------------------------|---------|-----------------|----|----|---------|
| <b>R-HHC vs. S-HHC</b> | 20.84   | -117,5 to 159,2 | No | ns | 0.9723  |
| <b>R-HHC vs. THC</b>   | -17.95  | -226,7 to 190,8 | No | ns | 0.9939  |
| <b>R-HHC vs. WIN</b>   | -17.85  | -164,9 to 129,2 | No | ns | 0.985   |
| <b>S-HHC vs. THC</b>   | -38.78  | -248,0 to 170,4 | No | ns | 0.9457  |
| <b>S-HHC vs. WIN</b>   | -38.69  | -186,8 to 109,4 | No | ns | 0.8759  |
| <b>THC vs. WIN</b>     | 0.09302 | -213,2 to 213,4 | No | ns | >0,9999 |

**Row 7**

|                        |        |                 |    |    |        |
|------------------------|--------|-----------------|----|----|--------|
| <b>R-HHC vs. S-HHC</b> | 14.28  | -87,46 to 116,0 | No | ns | 0.977  |
| <b>R-HHC vs. THC</b>   | -4.98  | -114,5 to 104,5 | No | ns | 0.9992 |
| <b>R-HHC vs. WIN</b>   | -35.03 | -184,1 to 114,1 | No | ns | 0.9008 |
| <b>S-HHC vs. THC</b>   | -19.26 | -119,5 to 80,93 | No | ns | 0.9447 |

|                      |        |                 |    |    |        |
|----------------------|--------|-----------------|----|----|--------|
| <b>S-HHC vs. WIN</b> | -49.3  | -193,6 to 94,98 | No | ns | 0.7446 |
| <b>THC vs. WIN</b>   | -30.05 | -178,4 to 118,3 | No | ns | 0.9327 |

| Test details | Mean 1 | Mean 2 | Mean Diff, | SE of diff, | N1 | N2 | q | DF |
|--------------|--------|--------|------------|-------------|----|----|---|----|
|--------------|--------|--------|------------|-------------|----|----|---|----|

| Row 1                  |       |       |        |       |   |   |     |     |
|------------------------|-------|-------|--------|-------|---|---|-----|-----|
| <b>R-HHC vs. S-HHC</b> | 605   | 566.4 | 38.63  | 57.77 | 9 | 9 | 0.9 | 16  |
| <b>R-HHC vs. THC</b>   | 605   | 596.2 | 8.796  | 53.17 | 9 | 9 | 0.2 | 15. |
| <b>R-HHC vs. WIN</b>   | 605   | 593.2 | 11.8   | 49.86 | 9 | 9 | 0.3 | 14. |
| <b>S-HHC vs. THC</b>   | 566.4 | 596.2 | -29.83 | 52.73 | 9 | 9 | 0.8 | 15. |
| <b>S-HHC vs. WIN</b>   | 566.4 | 593.2 | -26.82 | 49.39 | 9 | 9 | 0.7 | 14. |
| <b>THC vs. WIN</b>     | 596.2 | 593.2 | 3.008  | 43.92 | 9 | 9 | 0.0 | 15. |
|                        |       |       |        |       |   |   |     | 456 |
|                        |       |       |        |       |   |   |     | 339 |
|                        |       |       |        |       |   |   |     | 348 |
|                        |       |       |        |       |   |   |     | 002 |
|                        |       |       |        |       |   |   |     | 681 |
|                        |       |       |        |       |   |   |     | 968 |
|                        |       |       |        |       |   |   |     | 7   |

| Row 2                  |       |       |        |       |   |   |     |     |
|------------------------|-------|-------|--------|-------|---|---|-----|-----|
| <b>R-HHC vs. S-HHC</b> | 569.7 | 580.8 | -11.08 | 38.92 | 9 | 9 | 0.4 | 15. |
| <b>R-HHC vs. THC</b>   | 569.7 | 590.3 | -20.63 | 47.05 | 9 | 9 | 0.6 | 13. |
| <b>R-HHC vs. WIN</b>   | 569.7 | 621.8 | -52.16 | 53.27 | 9 | 9 | 1.3 | 12. |
| <b>S-HHC vs. THC</b>   | 580.8 | 590.3 | -9.551 | 49.5  | 9 | 9 | 0.2 | 14. |
| <b>S-HHC vs. WIN</b>   | 580.8 | 621.8 | -41.09 | 55.45 | 9 | 9 | 1.0 | 13. |
| <b>THC vs. WIN</b>     | 590.3 | 621.8 | -31.53 | 61.42 | 9 | 9 | 0.7 | 15. |
|                        |       |       |        |       |   |   |     | 024 |
|                        |       |       |        |       |   |   |     | 2   |
|                        |       |       |        |       |   |   |     | 85  |
|                        |       |       |        |       |   |   |     | 729 |
|                        |       |       |        |       |   |   |     | 48  |
|                        |       |       |        |       |   |   |     | 26  |
|                        |       |       |        |       |   |   |     | 57  |

| Row 3                  |       |       |        |       |   |   |     |        |
|------------------------|-------|-------|--------|-------|---|---|-----|--------|
| <b>R-HHC vs. S-HHC</b> | 594.8 | 577.4 | 17.42  | 44.9  | 9 | 9 | 0.5 | 15.487 |
| <b>R-HHC vs. THC</b>   | 594.8 | 606.5 | -11.64 | 53.24 | 9 | 9 | 0.3 | 15.092 |
| <b>R-HHC vs. WIN</b>   | 594.8 | 772.1 | -177.2 | 62.74 | 9 | 9 | 3.9 | 13.95  |
| <b>S-HHC vs. THC</b>   | 577.4 | 606.5 | -29.06 | 51.28 | 9 | 9 | 0.8 | 14.014 |
| <b>S-HHC vs. WIN</b>   | 577.4 | 772.1 | -194.7 | 61.09 | 9 | 9 | 4.5 | 12.06  |
| <b>THC vs. WIN</b>     | 606.5 | 772.1 | -165.6 | 67.46 | 9 | 9 | 3.4 | 15.72  |
| Row 4                  |       |       |        |       |   |   |     |        |
| <b>R-HHC vs. S-HHC</b> | 657.4 | 622.3 | 35.11  | 42.34 | 9 | 9 | 1.1 | 15.73  |
| <b>R-HHC vs. THC</b>   | 657.4 | 648.5 | 8.921  | 41.74 | 9 | 9 | 0.3 | 15.022 |
| <b>R-HHC vs. WIN</b>   | 657.4 | 736.5 | -79.09 | 57.98 | 9 | 9 | 1.9 | 14.29  |
| <b>S-HHC vs. THC</b>   | 622.3 | 648.5 | -26.19 | 37.19 | 9 | 9 | 0.9 | 15.957 |
| <b>S-HHC vs. WIN</b>   | 622.3 | 736.5 | -114.2 | 54.79 | 9 | 9 | 2.9 | 12.48  |
| <b>THC vs. WIN</b>     | 648.5 | 736.5 | -88.01 | 54.33 | 9 | 9 | 2.2 | 12.91  |
| Row 5                  |       |       |        |       |   |   |     |        |
| <b>R-HHC vs. S-HHC</b> | 643.1 | 651.7 | -8.598 | 54.48 | 9 | 9 | 0.2 | 14.232 |
| <b>R-HHC vs. THC</b>   | 643.1 | 639   | 4.088  | 47.82 | 9 | 9 | 0.1 | 15.209 |
| <b>R-HHC vs. WIN</b>   | 643.1 | 707.9 | -64.75 | 55.61 | 9 | 9 | 1.6 | 14.47  |
| <b>S-HHC vs. THC</b>   | 651.7 | 639   | 12.69  | 57    | 9 | 9 | 0.3 | 15.147 |



|                      |       |       |        |       |   |   |     |       |    |
|----------------------|-------|-------|--------|-------|---|---|-----|-------|----|
| <b>S-HHC vs. WIN</b> | 651.7 | 707.9 | -56.15 | 63.68 | 9 | 9 | 1.2 | 15.47 | 98 |
| <b>THC vs. WIN</b>   | 639   | 707.9 | -68.84 | 58.09 | 9 | 9 | 1.6 | 15.76 | 14 |

|                        |       |       |         |       |   |   |     |        |    |
|------------------------|-------|-------|---------|-------|---|---|-----|--------|----|
| <b>Row 6</b>           |       |       |         |       |   |   |     |        |    |
| <b>R-HHC vs. S-HHC</b> | 647.8 | 627   | 20.84   | 48.35 | 9 | 9 | 0.6 | 16.094 |    |
| <b>R-HHC vs. THC</b>   | 647.8 | 665.7 | -17.95  | 70.64 | 9 | 9 | 0.3 | 12.593 | 4  |
| <b>R-HHC vs. WIN</b>   | 647.8 | 665.6 | -17.85  | 51.32 | 9 | 9 | 0.4 | 15.92  | 75 |
| <b>S-HHC vs. THC</b>   | 627   | 665.7 | -38.78  | 70.91 | 9 | 9 | 0.7 | 12.735 | 52 |
| <b>S-HHC vs. WIN</b>   | 627   | 665.6 | -38.69  | 51.69 | 9 | 9 | 1.0 | 15.59  | 81 |
| <b>THC vs. WIN</b>     | 665.7 | 665.6 | 0.09302 | 72.96 | 9 | 9 | 0.0 | 13.018 | 38 |
|                        |       |       |         |       |   |   |     | 03     |    |

|                        |       |       |        |       |   |   |     |        |    |
|------------------------|-------|-------|--------|-------|---|---|-----|--------|----|
| <b>Row 7</b>           |       |       |        |       |   |   |     |        |    |
| <b>R-HHC vs. S-HHC</b> | 598.4 | 584.1 | 14.28  | 35.41 | 9 | 9 | 0.5 | 15.702 | 41 |
| <b>R-HHC vs. THC</b>   | 598.4 | 603.4 | -4.98  | 38.27 | 9 | 9 | 0.1 | 15.84  | 99 |
| <b>R-HHC vs. WIN</b>   | 598.4 | 633.4 | -35.03 | 51.09 | 9 | 9 | 0.9 | 13.695 | 55 |
| <b>S-HHC vs. THC</b>   | 584.1 | 603.4 | -19.26 | 34.9  | 9 | 9 | 0.7 | 15.803 | 54 |
| <b>S-HHC vs. WIN</b>   | 584.1 | 633.4 | -49.3  | 48.62 | 9 | 9 | 1.4 | 12.34  | 04 |
| <b>THC vs. WIN</b>     | 603.4 | 633.4 | -30.05 | 50.74 | 9 | 9 | 0.8 | 13.374 | 36 |
